# Supplementary material for: A Review of National-Level Adaptation Planning with Regards to the Risks Posed by Climate Change on Infectious Diseases in 14 OECD Nations
Source: MDPI journal article supplement (doi:10.3390/ijerph10127083), 2013-12-12
Supplement: s1 [file s1]

## A Review of National-Level Adaptation Planning with Regards to the Risks Posed by Climate Change on Infectious Diseases in 14 OECD Nations

**Table S1.** Scientific database search strategies and number of results.

| <b>PubMed</b>  |                                                                                                                                                                                                                                                                     |                |
|----------------|---------------------------------------------------------------------------------------------------------------------------------------------------------------------------------------------------------------------------------------------------------------------|----------------|
| <b>Set</b>     | <b>Searches</b>                                                                                                                                                                                                                                                     | <b>Results</b> |
| 1              | ("Climate Change" [Mesh]) AND ("Communicable Diseases" [Mesh] OR infectious disease * OR vector *borne OR water *borne OR food *borne OR surveillance OR public health) AND (adapt * OR mainstream *)                                                               | 510            |
| <b>Medline</b> |                                                                                                                                                                                                                                                                     |                |
| <b>Set</b>     | <b>Searches</b>                                                                                                                                                                                                                                                     | <b>Results</b> |
| 1              | climate change/ or global warming/                                                                                                                                                                                                                                  | 4,123          |
| 2              | communicable diseases/ or communicable diseases, emerging/                                                                                                                                                                                                          | 19,596         |
| 3              | disease outbreaks/ or epidemics/                                                                                                                                                                                                                                    | 61,218         |
| 4              | exp Foodborne Diseases/ep, ps [Epidemiology, Parasitology]                                                                                                                                                                                                          | 4,449          |
| 5              | Zoonoses/ or Insect Vectors/ or Disease Vectors/ or Parasitic Diseases/ or Communicable Diseases/ or Communicable Disease Control/                                                                                                                                  | 69,748         |
| 6              | public health/ or "environment and public health"/                                                                                                                                                                                                                  | 57,370         |
| 7              | Public Health Surveillance/                                                                                                                                                                                                                                         | 86             |
| 8              | 2 or 3 or 4 or 5 or 6 or 7                                                                                                                                                                                                                                          | 181,135        |
| 9              | Adapt *.mp.                                                                                                                                                                                                                                                         | 410,871        |
| 10             | Mainstream *.mp.                                                                                                                                                                                                                                                    | 7,525          |
| 11             | 9 or 10                                                                                                                                                                                                                                                             | 417,998        |
| 12             | 1 and 11                                                                                                                                                                                                                                                            | 706            |
| 13             | 8 and 12                                                                                                                                                                                                                                                            | 59             |
| 14             | 1 and 8                                                                                                                                                                                                                                                             | 331            |
| <b>EmBase</b>  |                                                                                                                                                                                                                                                                     |                |
| <b>Set</b>     | <b>Searches</b>                                                                                                                                                                                                                                                     | <b>Results</b> |
| 1              | climate change/                                                                                                                                                                                                                                                     | 11,215         |
| 2              | communicable disease/ or infection/                                                                                                                                                                                                                                 | 144,451        |
| 3              | (Communicable Disease * or infectious disease * or vector * borne or water * borne or food * borne).mp. [mp = title, abstract, subject headings, heading word, drug trade name, original title, device manufacturer, drug manufacturer, device trade name, keyword] | 73,621         |
| 4              | public health/                                                                                                                                                                                                                                                      | 75,664         |
| 5              | disease surveillance/                                                                                                                                                                                                                                               | 8,289          |
| 6              | 2 or 3 or 4 or 5                                                                                                                                                                                                                                                    | 273,681        |
| 7              | (adapt * or mainstream *.mp. [mp = title, abstract, subject headings, heading word, drug trade name, original title, device manufacturer, drug manufacturer, device trade name, keyword]                                                                            | 336,441        |
| 8              | 1 and 7                                                                                                                                                                                                                                                             | 1,395          |
| 9              | 6 and 8                                                                                                                                                                                                                                                             | 157            |

Table S1. Cont.

| Web of Knowledge |                                                                                                                                                                                                                                                           |           |
|------------------|-----------------------------------------------------------------------------------------------------------------------------------------------------------------------------------------------------------------------------------------------------------|-----------|
| Set              | History                                                                                                                                                                                                                                                   | Results   |
| # 5              | #4 AND #3<br>Timespan = All Years<br>Search language = English                                                                                                                                                                                            | 594       |
| # 4              | #2 AND #1<br>Timespan = All Years<br>Search language = English                                                                                                                                                                                            | 14,505    |
| # 3              | Topic = (Communicable Disease * OR infectious disease * OR vector * borne OR water * borne OR food * borne OR surveillance OR public health)<br>Timespan = All Years<br>Search language = English                                                         | 911,808   |
| # 2              | Topic = (adapt * or mainstream *)<br>Timespan = All Years<br>Search language = English                                                                                                                                                                    | 1,644,318 |
| # 1              | Topic = (climate change OR global warming)<br>Timespan = All Years<br>Search language = English                                                                                                                                                           | 158,363   |
| Scopus           |                                                                                                                                                                                                                                                           |           |
| Set              | Searches                                                                                                                                                                                                                                                  | Results   |
| 10               | (TITLE-ABS-KEY (communicable disease * OR infectious disease * OR vector * borne OR water * borne OR food * borne OR surveillance OR public health)) AND ((TITLE-ABS-KEY (climate change adapt *)) OR (TITLE-ABS-KEY (climate change mainstream *)))      | 45        |
| 9                | TITLE-ABS-KEY (climate change adapt *) OR (TITLE-ABS-KEY (climate change mainstream *))                                                                                                                                                                   | 13,461    |
| 8                | TITLE-ABS-KEY (climate change mainstream *)                                                                                                                                                                                                               | 369       |
| 7                | (TITLE-ABS-KEY (communicable disease * OR infectious disease * OR vector * borne OR water * borne OR food * borne OR surveillance OR public health)) AND (TITLE-ABS-KEY (climate change adapt *))                                                         | 44        |
| 6                | TITLE-ABS-KEY (climate change adapt*)                                                                                                                                                                                                                     | 13,224    |
| 5                | ((TITLE-ABS-KEY (Climate Change or Global Warming)) AND (TITLE-ABS-KEY (adapt or mainstream *))) AND (TITLE-ABS-KEY (communicable disease * OR infectious disease * OR vector * borne OR water * borne OR food * borne OR surveillance OR public health)) | 12        |
| 4                | TITLE-ABS-KEY (communicable disease * OR infectious disease * OR vector * borne OR water * borne OR food * borne OR surveillance OR public health)                                                                                                        | 20,225    |
| 3                | (TITLE-ABS-KEY (Climate Change or Global Warming)) AND (TITLE-ABS-KEY (adapt or mainstream *))                                                                                                                                                            | 1,982     |
| 2                | TITLE-ABS-KEY (adapt or mainstream *)                                                                                                                                                                                                                     | 1,096,111 |
| 1                | TITLE-ABS-KEY (climate change or global warming)                                                                                                                                                                                                          | 24,203    |

**Figure S1.** Peer-reviewed literature search and inclusion criteria.

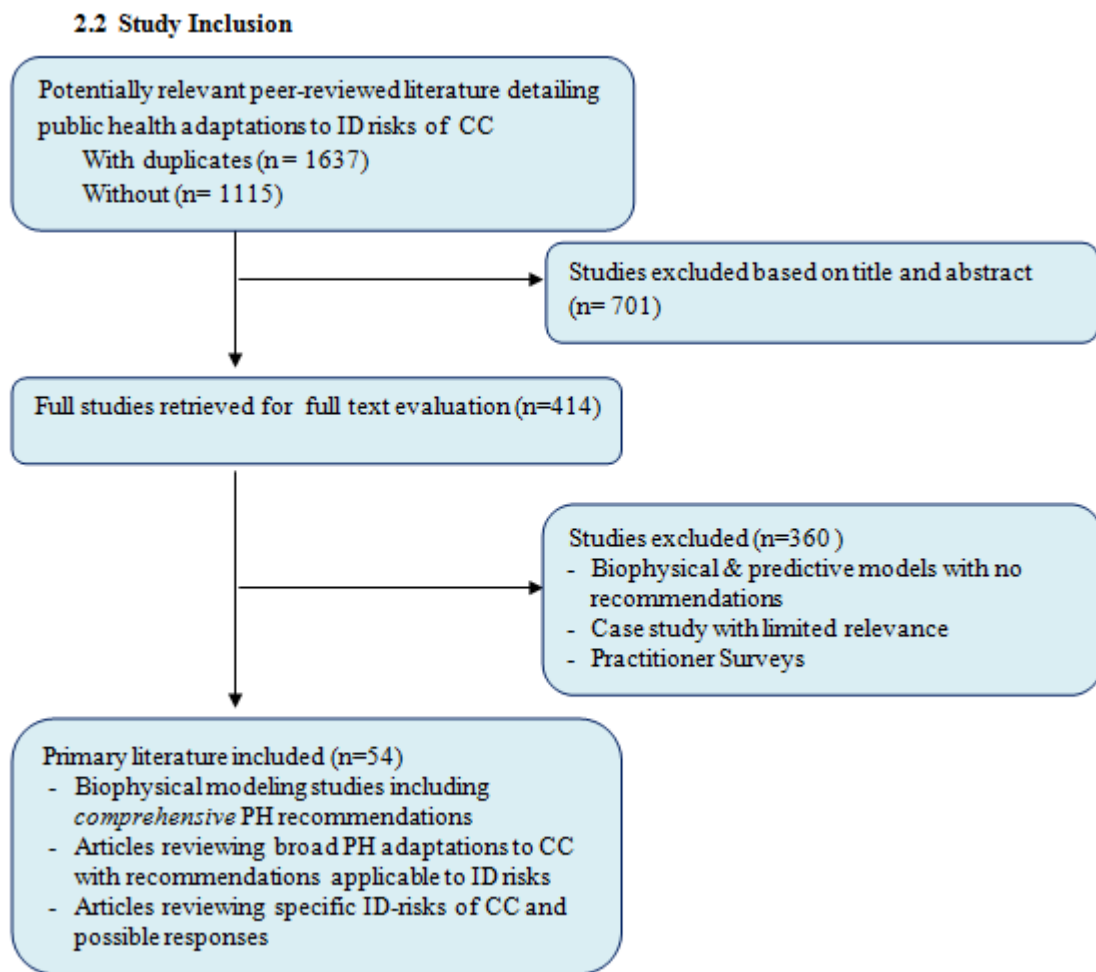

© 2013 by the authors; licensee MDPI, Basel, Switzerland. This article is an open access article distributed under the terms and conditions of the Creative Commons Attribution license (<http://creativecommons.org/licenses/by/3.0/>).
